# Neocortical inhibitory interneuron subtypes display distinct responses to synchrony and rate of inputs

Matthew M. Tran<sup>1,2</sup>, Luke Y. Prince<sup>1</sup>, Dorian Gray<sup>1</sup>, Lydia Saad<sup>1</sup>, Helen Chasiotis<sup>1</sup>, Jeehyun Kwag<sup>3</sup>, Michael M. Kohl<sup>4</sup>, Blake A. Richards<sup>\*1,2,5,6,7,8</sup>

1. Dept. of Biological Sciences, University of Toronto Scarborough, Toronto, ON, Canada
2. Dept. of Cell and Systems Biology, University of Toronto, Toronto, ON, Canada
3. Dept. of Brain and Cognitive Engineering, Korea University, Seoul, South Korea
4. Institute of Neuroscience and Psychology, University of Glasgow, Glasgow, UK
5. Vector Institute for Artificial Intelligence, Toronto, ON, Canada
6. Dept. of Neurology and Neurosurgery, McGill University, Montreal, QC, Canada
7. School of Computer Science, McGill University, Montreal, QC, Canada
8. Mila, Montreal, QC, Canada

\* Corresponding author: [blake.richards@mcgill.ca](mailto:blake.richards@mcgill.ca)

## Abstract

Populations of neurons in the neocortex can carry information with both the synchrony and the rate of their spikes. However, it is unknown whether distinct subtypes of neurons in the cortical microcircuit are more sensitive to information carried by synchrony versus rate. Here, we address this question using patterned optical stimulation in slices of barrel cortex from transgenic mouse lines labelling distinct interneuron populations: fast-spiking parvalbumin-positive (PV+) and somatostatin-positive (SST+) interneurons. We use optical stimulation of channelrhodopsin-2 (ChR2) expressing excitatory neurons in layer 2/3 in order to encode a random 1-bit signal in either the synchrony or rate of activity. We then examine the mutual information between this 1-bit signal and the voltage and spiking responses in PV+ and SST+ interneurons. Generally, we find that both interneuron types carry more information than GFP negative control cells. More specifically, we find that for a synchrony encoding, PV+ interneurons carry more information in the first 5 milliseconds, while both interneuron subtypes carry more information than negative controls in their later response. We also find that for a rate encoding, SST+ interneurons carry more information than either PV+ or negative controls after several milliseconds. These data demonstrate that inhibitory interneuron subtypes in the neocortex have distinct responses to information carried by synchrony versus rates of activity.

## Keywords

Neural code, rate code, synchrony code, inhibitory interneurons, neocortex, optogenetics

## Introduction

One of the foundational concepts in neuroscience is that neurons encode information with their action potentials. The earliest demonstrations that action potentials carry information came from Lord Adrian (1926), who demonstrated that the rate of spikes in peripheral nerves is correlated with the force applied to a limb<sup>1</sup>. Decades of work following this demonstrated that the rate of spikes can carry information about almost any aspect of the environment or an animal's behaviour, including sensory stimuli<sup>2</sup>, spatial location<sup>3</sup>, action selection<sup>4</sup>, etc. However, the rate-of-fire of a neuron is not the only aspect of a spike train that can carry information<sup>5</sup>. It has also been demonstrated that the specific timing of action potentials can correlate with salient variables, including sensory stimuli<sup>6,7</sup>, spatial location<sup>8</sup>, and action selection<sup>9,10</sup>. There are a variety of potential coding schemes using spike times<sup>5</sup>, but basic principles of postsynaptic spatiotemporal integration tell us that the synchrony of incoming inputs can be as important as the rate of incoming inputs to a neuron<sup>11</sup>. Therefore, the brain is likely to encode information using both the synchrony and rate of action potentials<sup>12,13</sup>.

One interesting aspect of information encoding with both synchrony and rate of spikes is that different cells with different biophysical properties will respond to each signal differently<sup>14</sup>. For example, when we consider linear integration, a cell with a short membrane time constant will be more sensitive to information carried by synchronous inputs, whereas a cell with a longer time constant would be more sensitive to the rate of inputs. These issues are particularly salient when we consider the diversity of biophysical properties found in neocortical inhibitory interneurons<sup>15,16</sup>. Different types of inhibitory interneurons possess intrinsic membrane properties, morphologies, firing patterns, and presynaptic inputs<sup>15</sup>. For example, parvalbumin-positive (PV+) inhibitory interneurons are known to have very short membrane time constants, fast-spiking behaviour, and short-term depressing presynaptic inputs<sup>17</sup>. In contrast, somatostatin-positive (SST+) inhibitory interneurons possess adapting firing patterns and short-term facilitating presynaptic inputs<sup>18</sup>. These distinct biophysical properties of interneurons are likely relevant to information encoding in the brain<sup>19,20</sup>.

Given that different interneuron subtypes, such as PV+ and SST+ cells, display distinct biophysical properties, it is possible that each subtype is more or less sensitive to information conveyed by presynaptic synchrony or rate. However, although interneuron subtypes, particularly PV+ and SST+, have been studied extensively over recent decades, it is unknown whether there are functional specializations in the integration of information carried by spike synchrony or spike rate.

Here, we explored this question using a combination of transgenics, *ex vivo* whole-cell patch clamping, and patterned optogenetic illumination. Specifically, we examined the responses of PV+ and SST+ inhibitory interneurons in the barrel cortex of mice when presynaptic excitatory inputs were driven optogenetically. Using a digital multimirror device, we encoded a random 1-bit signal by controlling either the synchrony or rates of optical activation of presynaptic inputs. We then examined the amount of information encoded by PV+, SST+ and pyramidal neurons about this 1-bit signal. We found that each class of cell was differentially sensitive to the synchrony and rate of optical activations of presynaptic inputs. Specifically, we observed that both interneuron types carried more information in their spiking responses than pyramidal neurons but in different ways. PV+ interneurons carried more information about the

1-bit signal in their early (<5 ms) responses to synchronous activation. Both interneuron types carried more information in response to synchronous activation after more time (> 5ms). When we examined the responses to rate encoding, SST+ interneurons carried more information about the 1-bit signal than either PV+ or pyramidal neurons in their later responses. These data confirm that different types of inhibitory interneurons can integrate information carried by synchrony or rate of inputs in different ways. This suggests that the inhibition received by pyramidal neurons in the neocortex may be selectively routed by synchrony and the rate of action potentials.

## Results

### Transgenic targeting of PV+ and SST+ interneurons

We focused our investigation on layer 2/3 the somatosensory cortex, as this is a region of the neocortex where synchrony and rate codes have been extensively explored. In order to target different populations of interneurons within L2/3 of the barrel cortex, we used GAD67-GFP and Gin-GFP transgenic mice which have been reported to selectively express GFP in PV+ and SST+ interneurons, respectively<sup>21,22</sup>. To confirm this selective expression of GFP, we characterized GFP cells in these two transgenic lines using immunohistochemical and electrophysiological properties.

Immunohistochemistry staining for PV protein in the barrel cortex of GAD-67-GFP animals showed a higher probability of GFP+ cells being PV+ ( $P(\text{PV+}|\text{GFP+})$ ,  $59.4\% \pm 7.5\%$ ,  $n = 7$  animals) and vice versa ( $P(\text{GFP+}|\text{PV+})$ ,  $33.5\% \pm 3.1\%$ ,  $n = 7$ ) when compared to staining for SST peptide ( $P(\text{GFP+}|\text{SST+})$ ,  $5.0\% \pm 1.4\%$ ,  $n = 6$ ;  $P(\text{SST+}|\text{GFP+})$ ,  $3.0\% \pm 0.6\%$ ,  $n = 6$ ; **Fig. 1A top row**). In Gin-GFP animals, the opposite was seen. In particular, when staining for SST, Gin-GFP animals showed a higher probability of GFP+ cells being SST+ ( $P(\text{SST+}|\text{GFP+})$ ,  $94.9\% \pm 7.0\%$ ,  $n = 5$ ) and vice versa ( $P(\text{GFP+}|\text{SST+})$ ,  $74.3\% \pm 4.2\%$ ), than when compared to PV protein staining ( $P(\text{PV+}|\text{GFP+})$ ,  $0.2\% \pm 0.2\%$ ,  $n = 6$ ,  $P(\text{GFP+}|\text{PV+})$ ,  $0.1\% \pm 0.1\%$ ,  $n = 6$ ; **Fig. 1A, bottom row**). These results suggest a reasonable level of both genotypic specificity and efficiency and is in line with previous work which suggests that GAD67-GFP and Gin-GFP animals target PV+ and SST+ cells, respectively<sup>21-24</sup>.

Whole cell patch clamp recordings from both GFP- and GFP+ cells in layer 2/3 of the barrel cortex to analyze each cell's electrophysiological properties. In the GAD67-GFP transgenic line, nearly all of the GFP+ cells ( $N=26$ ) exhibited spiking behaviour typical of cortical PV+ cells: they were often fast-spiking and reached average peak frequencies of roughly 150 Hz in response to positive current clamp injections (**Fig 1B,C,D**). GFP+ cells in the Gin-GFP transgenic line ( $n = 30$ ) showed different spiking characteristics to the GAD67-GFP+ cells as their spiking tended to accommodate in response to increasing current injections and often peaked at around 100 Hz (**Fig. 1B-D**), a hallmark firing pattern for almost 90% of SST+ cells<sup>23</sup>.

To compare with these cell populations, we also recorded from GFP- cells in each transgenic line ( $n = 30$ ). Usually, these GFP- cells exhibited regular firing patterns typical of layer 2/3 pyramidal cells (**Fig. 1B-D**). Sometimes, they exhibited fast-spiking behaviour (4 cells), which is to be expected from a random sampling of cells in the circuit. These cells are shown here, but were excluded from later analyses. A principal components analysis (PCA) of each

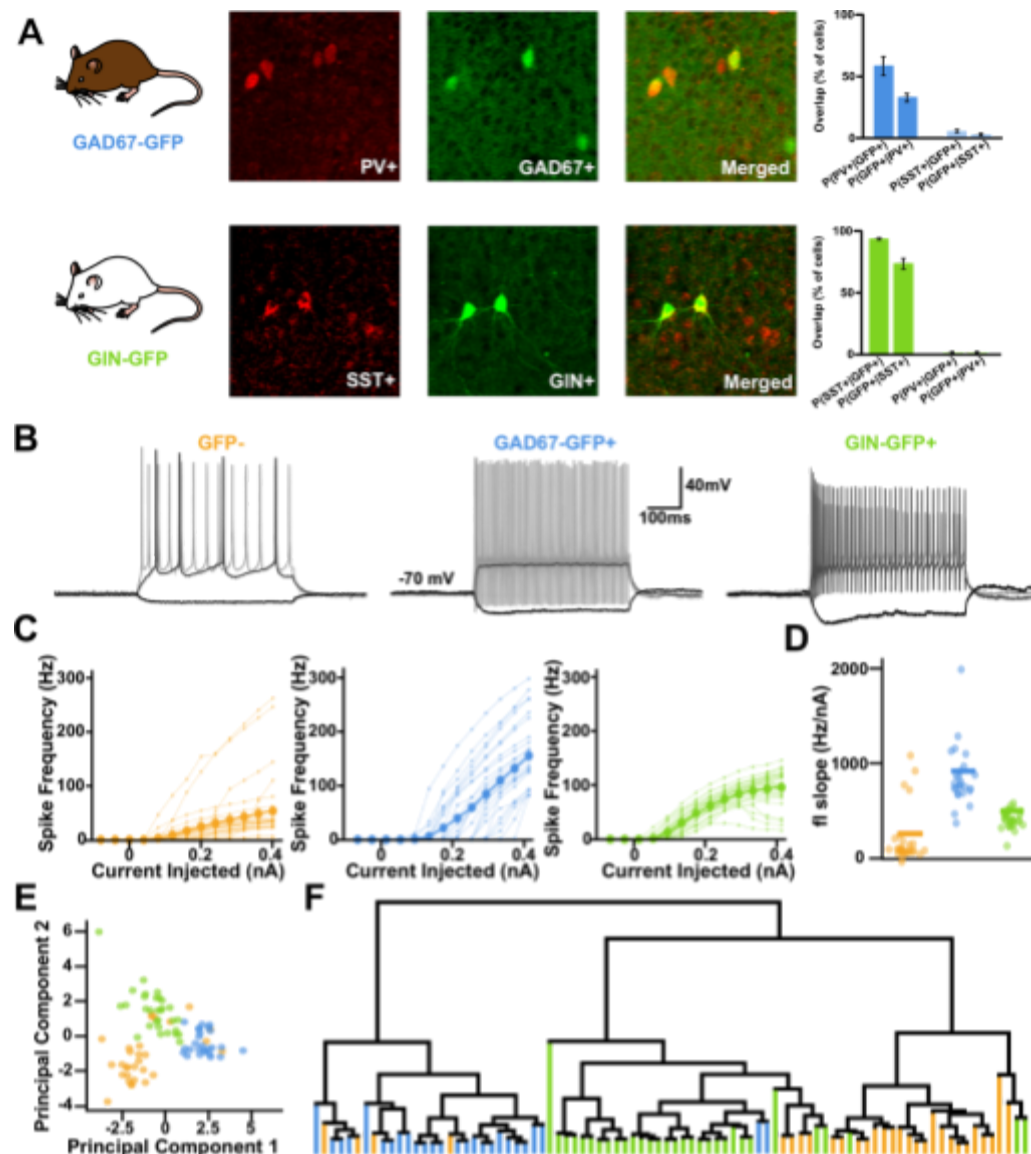

**Figure 1. Gad67-GFP and Gin-GFP mice target distinct populations of neurons, likely fast-spiking PV+ and SST+ interneurons, respectively. (A)** Sample immunohistochemistry images from both transgenic lines. **(B)** Sample electrophysiological traces from each cell type to current injections -80 pA, +160 pA, +400 pA (darkest to lightest). **(C)** Frequency vs. current injection (fi) curves for each cell type. **(D)** Mean slope of the fi curves for each cell type. Larger circles represent mean values. **(E)** 2 Component PCA of each cell type's electrophysiological characteristics. **(F)** Dendrogram clustering.

cell's electrophysiological characteristics (e.g. adaptation ratio, sag amplitude, and membrane tau; see *Materials and Methods*) revealed three distinct clusters in the first two principal components (**Fig. 1E**). When these components were used to map the recorded cells onto a

dendrogram, three distinct clusters that were largely consistent with selective labelling of distinct subtypes were revealed (**Fig. 1F**).

Altogether, these results confirm that GAD67-GFP and Gin-GFP transgenic mice express GFP in distinct cell types, likely corresponding to PV+ and SST+ interneurons and that most GFP- cells are not from these subclasses of interneurons.

### Encoding a random 1-bit signal using patterned optical stimulation

Central to our experimental objective is the ability to encode information via the synchrony or rate of presynaptic inputs to a neuron. To do this, we adopted a patterned optical stimulation approach. We infected the barrel cortex of 5-7 week old mice with an adeno-associated virus carrying channelrhodopsin-2 and the mCherry reporter, under the  $Ca^{2+}$ /calmodulin-dependent protein kinase II promoter (rAAV1-CamKII-hChR2(h134r)-mCherry). This led to expression in the pyramidal neurons of layer 2/3, and we did not observe any hChR2 expression in GFP+ neurons (**Fig. 2A**). After sufficient time for expression (2-3 weeks), we then prepared *ex vivo* slices of barrel cortex and used a digital multimirror device to illuminate the layer 2/3 with spatially controlled patterns of light (**Fig. 2B**; see *Materials and Methods*). Whole-cell recordings from infected neurons demonstrated that we could use spatially restricted discs of illumination (470 nm, 15  $\mu$ m diameter, 19 mW/mm<sup>2</sup>) to reliably induce spiking in targeted pyramidal neurons (**Fig. 2C**). We also examined the responses of neurons at different distances from the disc of illumination (**Fig. S1A**). We found that due to the limitations of 1-photon excitation, neurons up to 50  $\mu$ m away from a disc of illumination could also spike (**Fig. S1B-D**). Nonetheless, targeted

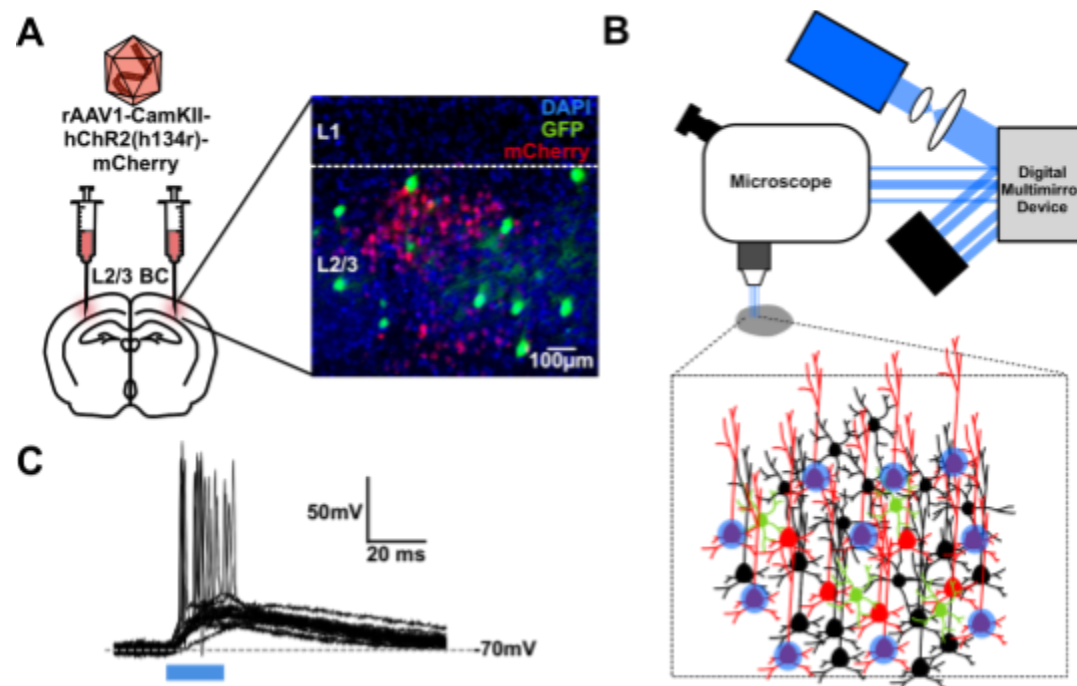

**Figure 2. Patterned optical stimulation of ChR2+ Layer 2/3 Pyramidal Neurons.** (A) Viral transfection of Channelrhodopsin-2 into L2/3 Pyramidal Neurons. (B) Illustration of patterned optical stimulation protocol. (C) Sample responses from ChR2+ layer 2/3 Pyramidal neurons ( $n = 15$ ) to a 15  $\mu$ m spot placed directly on top of the recorded neuron.



neurons spiked earlier and more reliably than non-targeted neurons, and neurons farther than 50  $\mu\text{m}$  rarely spiked (**Fig. S1B-D**). This demonstrated that we could use the digital multimirror device to selectively activate particular regions of interest (ROIs) in the slice.

Next, we performed whole-cell patch clamp recording of GFP+ (and some GFP-) neurons in the slices. We used our patterned optical illumination approach to encode a 1-bit random signal (i.e. a signal with two states, 0 or 1) in the activity of 10 ROIs containing ChR2 expressing neurons that were presynaptic to the patched neuron (**Fig. 3A-B**). We encoded this signal using either the synchrony or rate of optical activation of the 10 presynaptic ROIs. To restrict our data to 10 ROIs with monosynaptic inputs to the patched neuron, we examined the postsynaptic responses in the first 5 ms of optical activation (**Fig. 3B, insets**). We only included recordings for subsequent analyses if the 10 ROIs elicited monosynaptic-driven depolarization, i.e. depolarization commencing 0.5-2 ms after stimulation onset, in at least 90% of the optical stimulations (**Fig. 3C**; see *Materials and Methods*).

To encode the 1-bit signal using the synchrony of activation, we created an optical activation pattern where each ROI was activated at a constant rate of 2.7 Hz, but with low synchrony for the 0 state, and high synchrony for the 1 state (**Fig. 3D**). During the low synchrony state, the activation times of the 10 ROIs were sampled from 10 independent Poisson processes, whereas during high synchrony states the activation times were sampled from a single Poisson process. As a result, when the 1-bit signal was in the 0 state, the 10 ROIs were activated at independent times, whereas when the 1-bit signal was in the 1 state, the 10 ROIs were activated synchronously. But, importantly, the rate of activation of the ROIs was identical in the two states. To encode the 1-bit signal using the rate of activation, we used a low rate for the 0 state and a high rate for the 1 state (**Fig. 3E**). Specifically, we always sampled the activation times of the ROIs from 10 independent Poisson processes, but for the 0 state we sampled with a 0.5 Hz rate, and for the 1 state we sampled with a 5 Hz rate. This meant that the average rates were the same as for the synchrony encoding (2.7 Hz), but the rates changed depending on the state of the 1-bit signal. We found that, in comparison to whole-field illumination protocols, these patterned optical illumination protocols produced qualitatively more natural responses in the recorded neurons, which was confirmed by analyzing the spectral densities of the whole-cell recordings (**Fig. S2**). Therefore, using our synchrony and rate encoding protocols, we could investigate the extent to which different subtypes of neurons in layer 2/3 barrel cortex are sensitive to information encoded with the synchrony or rate of presynaptic inputs.

### **Responses to synchrony encoding differ between neuron subtypes**

We first examined the responses of GAD67-GFP+ cells (likely PV+ interneurons), Gin-GFP+ cells (likely SST+ interneurons), and non-fast spiking GFP- (likely pyramidal neurons) to the synchrony encoding protocol (NF:  $n = 17$ , PV+:  $n = 21$ , SST+:  $n = 22$ ). All three types of neurons exhibited reliable responses to the optical stimulation patterns that differed between the 0 and 1 states of the random signal (**Fig. 4A**).

To determine the extent to which each subtype of neuron was sensitive to information encoded in the synchrony of presynaptic inputs, we used information theoretic tools.

Specifically, we examined the mutual information between the 1-bit signal and various aspects of the patched cells' activity. Because our optical protocol did not include any inhibition, the

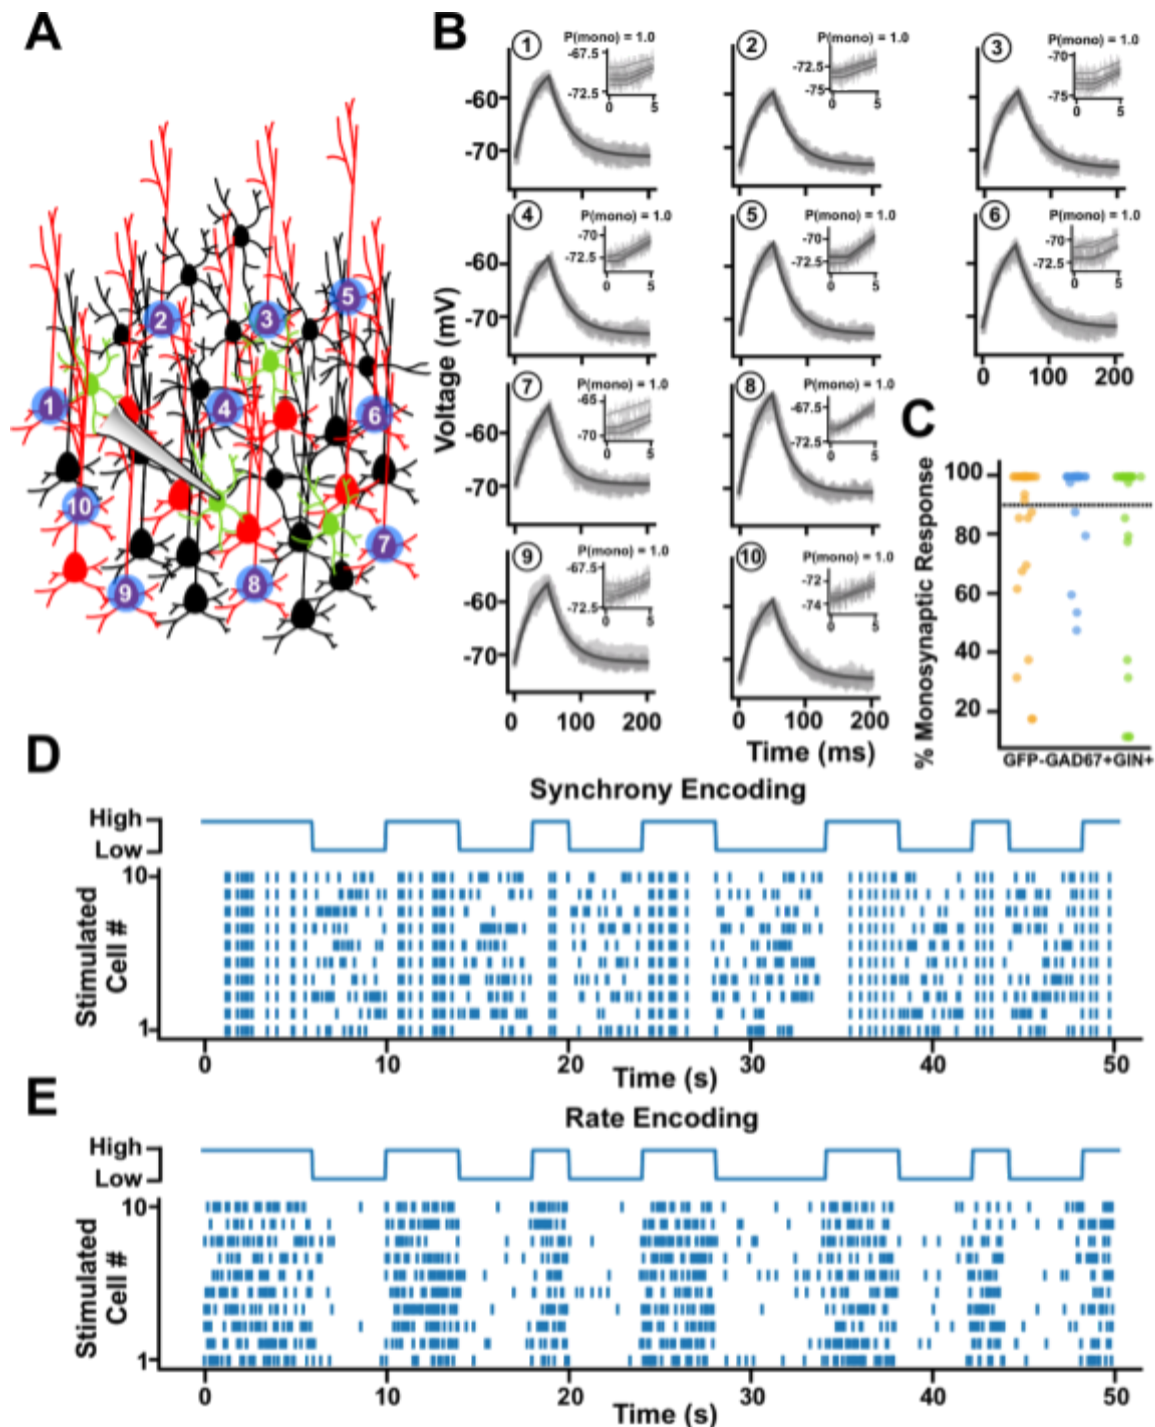

**Figure 3. Artificially encoding a random 1-bit signal using the synchrony or rate of optical inputs to ChR2+ Pyramidal Neurons in Layer 2/3 (A)** Experimental protocol. **(B)** Example postsynaptic traces from a sample cell showing 10 presynaptic cells which passed the monosynaptic reliability test. **(C)** Distribution of input cells and their monosynaptic reliability. **(D)** Sample raster plots illustrating how the 1-bit signal was encoded using synchrony of optical inputs. **(E)** Sample raster plots illustrating how the 1-bit signal was encoded using the rate of optical inputs.

activation of the 10 ROIs induced prolonged polysynaptic activity in the tissue (**Fig. S3**). In order to estimate potential differences in monosynaptic versus polysynaptic responses, we divided our analyses into the responses in the first 5 ms of optical activation (which should be largely monosynaptic) and the later responses (which should be largely polysynaptic).

First, we examined the voltage responses in the recorded neurons. We measured the mean membrane potential of the patched neuron in the 0-5 ms and 5-50 ms time windows following optical activation of the presynaptic ROIs. We observed clear depolarization in both the 0 state and 1 state in all recorded neurons in both time windows, but there were differences in the responses between the two states. In the 0 state, the neurons were generally depolarized over time to a moderate degree, whereas in the 1 state the patched neurons were either at rest or highly depolarized. This held for both the monosynaptic and polysynaptic time windows. There were differences in the responses of each neuron type, but they were all showed clear distinctions in their voltage responses to the 0 and 1 state. As a result, we found that each neuron type was roughly equal in the amount of mutual information between the 1-bit signal and their mean voltage, for both the monosynaptic (**Fig. 4B**;  $NF = 0.3928 \pm 0.1294$ ,  $PV+ = 0.4206 \pm 0.1075$ ,  $SST+ = 0.4211 \pm 0.0827$ ) and polysynaptic windows (**Fig. 4C**;  $NF = 0.4562 \pm 0.1353$ ,  $PV+ = 0.4917 \pm 0.0796$ ,  $SST+ = 0.5079 \pm 0.0681$ ). This data shows that although there are differences in the responses of each neuron type to the synchrony encoded information, the amount of information they carry in their average membrane potential is equivalent.

Next, we examined the spiking responses of the patched neurons. Again, we split our analyses into approximately monosynaptic and polysynaptic time windows. However, here, we simply examined the number of postsynaptic spikes in the patched neurons. As expected, we found that the spike counts were variable and correlated with the number of presynaptic ROIs that were activated, such that during the 0 state of low synchrony the spike counts were highly variable, but during the 1 state of high synchrony, the spike counts were consistently high (when all the ROIs were activated) or zero (when none of the ROIs were activated). Interestingly, unlike the mean voltage responses, we observed clear differences between neuron types in the mutual information between the 1-bit signal and the spike counts. In the monosynaptic window, GAD67-GFP+ cells showed the highest amount of mutual information with the random 1-bit signal (**Fig. 4D**;  $NF = 0.0218 \pm 0.0187$ ,  $PV+ = 0.0861 \pm 0.0954$ ,  $SST+ = 0.0338 \pm 0.0332$ ). These data suggest that when we consider spiking behaviour, PV+ interneurons rapidly convey more information than either SST+ interneurons or pyramidal neurons about signals encoded with synchronous monosynaptic inputs.

Meanwhile, for the polysynaptic time window, the GAD67-GFP+ and Gin-GFP+ cells showed equal levels of mutual information with the 1-bit signal, both of which were higher than the information contained in the spike counts of the GFP- neurons (**Fig. 4E**;  $NF = 0.0580 \pm 0.0641$ ,  $PV+ = 0.1688 \pm 0.1242$ ,  $SST+ = 0.2472 \pm 0.1049$ ,  $NF = 0.0580 \pm 0.0641$ ,  $PV+ = 0.1679 \pm 0.1254$ ,  $SST+ = 0.2472 \pm 0.1049$ ). This suggests that both interneuron subtypes may be more sensitive to signals encoded with synchronous inputs than pyramidal neurons. However, it should be noted that in the polysynaptic time window there may be differences in the rate of synaptic inputs thanks to the reverberation of activity in the tissue. This could include not only the 10 ROIs themselves but also neurons activated by the 10 ROIs. So, whether these differences reflect a different sensitivity to synchrony of inputs, or different sensitivity to inputs



driven by synchronous inputs, is impossible to know. Nonetheless, taken together with the data from the monosynaptic time window, we can say that our results demonstrate that PV+ interneurons, SST+ interneurons, and pyramidal neurons carry different amounts of information about a 1-bit signal that has been encoded via optical activation of 10 ROIs in a synchronous vs. non-synchronous manner.

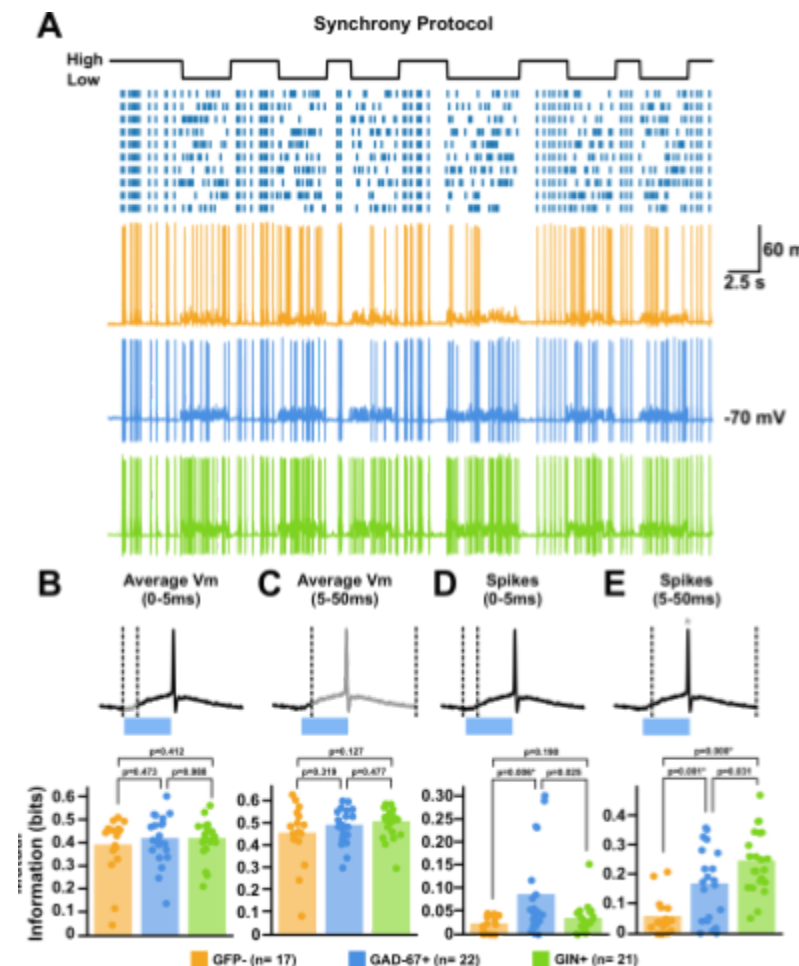

**Figure 4. Different subtypes of interneurons carry different amounts of information in response to our synchrony encoding. (A)** Sample traces of each cell type to the synchrony encoding. **(B)** Mutual information analysis of the average membrane potential of each cell type to our 1-bit signal within early (0-5ms) response. Dotted lines indicate window of analysis, with greyed areas indicating what part of the response was analyzed. **(C)** Same analysis as (B) but restricting the analysis to only the later (5-50ms) responses. **(D)** Mutual information analysis of the spike counts of each cell type to our 1-bit signal within early (0-5ms) response. **(E)** Same analysis as (D) but restricting the analysis to only the later (5-50ms) responses.

### Responses to a rate encoding differ between neuron subtypes

We then examined responses (NF:  $n = 17$ , PV+:  $n = 20$ , SST+:  $n = 22$ ) to the same one-bit signal encoded via the rate of activation of the ROIs. To ensure that any information about the signal encoded by the postsynaptic response was driven by the increase in the rate of optogenetic activation, rather than the unavoidable increase in synchronous stimulation of ROIs with increased rate (see **Fig. S4**), we conditioned our mutual information measure on the ROI activation count in each time bin (see *Materials and Methods*).

As in the previous section, we first examined the voltage responses in the recorded neurons, split into the first 0-5 ms and the subsequent 5-50 ms time windows following optical activation of the presynaptic ROIs. In contrast to voltage responses to the synchrony code, neurons tended to show greater average depolarization during the 1 state than in the 0 state

(Fig. 5A). However, we found that PV+ interneurons tended to have lower conditional mutual information with the 1-bit signal than the other cell types in both the monosynaptic (Fig. 5B; NF =  $0.1682 \pm 0.0286$ , PV+ =  $0.1161 \pm 0.0519$ , SST+ =  $0.1755 \pm 0.0278$ ) and polysynaptic (Fig. 5C; NF =  $0.0802 \pm 0.0238$ , PV+ =  $0.0510 \pm 0.0253$ , SST+ =  $0.0782 \pm 0.0214$ ) windows. These data indicate that the membrane potential fluctuations of PV+ interneurons are less sensitive to rate encoded signals than SST+ interneurons and pyramidal cells.

We then examined the spiking responses of our recorded neurons, again splitting spike times into those occurring during the monosynaptic and postsynaptic windows. Spiking was more frequent in the 1 state than in the 0 state for all neurons, and spike counts tended to increase monotonically with the number of ROIs activated. The purpose of conditioning on ROI activation count is to determine whether there was a difference in spike counts accounted for only by the signal state, and not the number of ROIs activated. We found that for spikes occurring during the monosynaptic window, there was little difference in conditional mutual information with the one-bit signal between PV+ and SST+ interneurons, although both tended to carry more information about the signal than NF cells (Fig. 5D; NF =  $0.0010 \pm 0.0030$ , PV+ =  $0.0085 \pm 0.0089$ , SST+ =  $0.0097 \pm 0.0172$ ). This indicates that rapid responses to rate encoded pyramidal cell activity are similar between PV+ and SST+ interneurons.

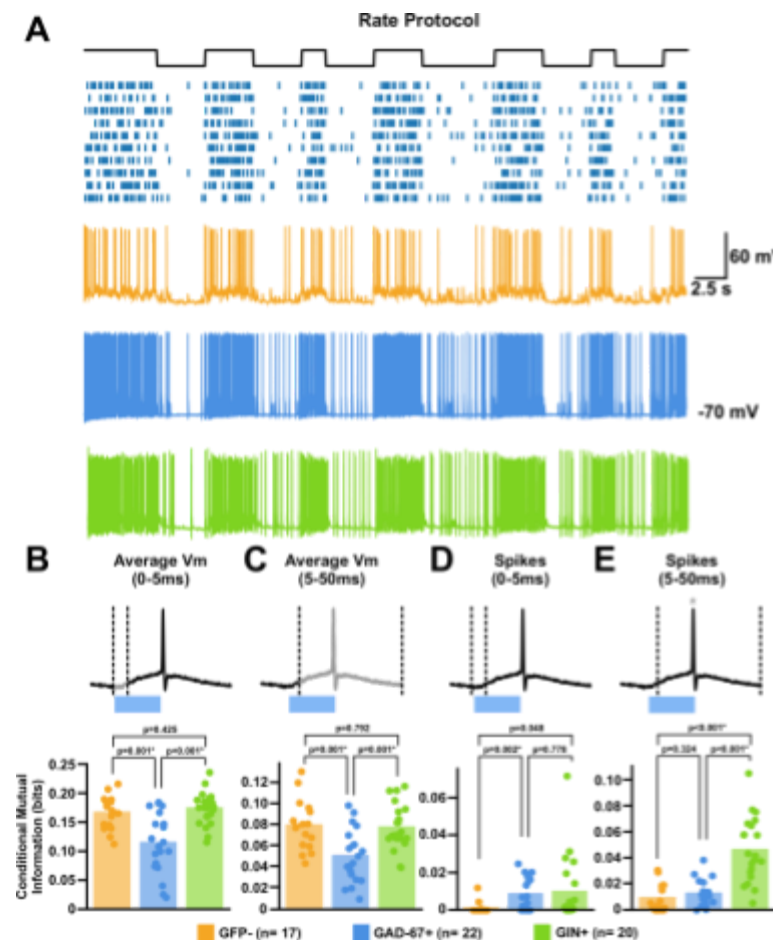

**Figure 5. Different subtypes of interneurons carry different amounts of information in response to our rate encoding. (A)** Sample traces of each cell type to the rate encoding. **(B)** Mutual information analysis of the average membrane potential of each cell type to our 1-bit signal within early (0-5ms) response. Dotted lines indicate window of analysis, with greyed areas indicating what part of the response was analyzed. **(C)** Same analysis as (B) but restricting the analysis to only the later (5-50ms) responses. **(D)** Mutual information analysis of the spike counts of each cell type to our 1-bit signal within early (0-5ms) response. **(E)** Same analysis as (D) but restricting the analysis to only the later (5-50ms) responses.

Interestingly, for spikes occurring during the polysynaptic time window, SST+ interneurons carried more information about the signal than both the PV+ and NF cells, which carried similar amounts of information (**Fig. 5E**; NF =  $0.0091 \pm 0.0106$ , PV+ =  $0.0126 \pm 0.0102$ , SST+ =  $0.0463 \pm 0.0243$ ). This indicates that SST+ interneurons can accumulate information about rate encoded signals over longer time windows than both PV+ and NF cells.

## Discussion

Using a digital multimirror device, we performed *ex vivo* experiments in slices of mouse barrel cortex to examine the sensitivity of different interneuron subtypes to information encoded with the synchrony or rate of presynaptic inputs. Using GAD67-GFP and Gin-GFP transgenic mice coupled with viral infection of pyramidal neurons with ChR2, we were able to examine the responses of layer 2/3 PV+ and SST+ interneurons (as well as NF, GFP- cells that were likely pyramidal neurons, **Fig. 1**). We examined their responses to a 1-bit random signal encoded with either the synchrony or the rate of optical ROI activation (**Fig. 2-3**). We found that there were indeed differences between cell types in the amount of information carried about the 1-bit signal. When the signal was encoded using the synchrony of ROI activation, all of the cell types carried similar amounts of information in their membrane potentials, but spiking responses showed differences (**Fig. 4**). PV+ interneurons carried more information than the other types during an early, likely monosynaptic time-window, while both PV+ and SST+ interneurons carried more information than NF cells in a later time-window. When the signal was encoded with the rate of ROI activation, we found that PV+ interneurons carried less information than either SST+ or NF cells in their membrane potential. For spiking responses, both PV+ interneurons and SST+ interneurons carried more information than NF cells in the early monosynaptic window, but in the later time-window, SST+ interneurons carried more information than either NF or PV+ cells (**Fig. 5**). Altogether, these results demonstrate that there are differences between neocortical cell types in their sensitivity to information encoded with the synchrony or rate of presynaptic inputs.

Our findings are broadly in-line with what is known about neuronal subtypes in the neocortex. First, we found that both interneuron types tended to carry more information than the NF cells in their spiking responses. This fits with a previous study which reported higher amounts of information about sensory stimuli in barrel cortex inhibitory interneurons compared to excitatory neurons<sup>25</sup>. Second, our finding that PV+ interneurons' spikes rapidly convey information about a signal encoded with synchronous inputs, while SST+ interneurons gradually accumulate information about a signal encoded with different rates of inputs, fits with what is broadly known about the biophysics of these cell types. Specifically, the rapid membrane time-constants, short-term depressing synaptic inputs, and rapid spiking properties of PV+ interneurons<sup>17</sup> fits with rapid transmission of information about synchronous inputs, while the adapting spiking responses and short-term facilitating synaptic inputs of SST+ interneurons<sup>23</sup> fits with long latency responses to high rate inputs.

Our data suggest that there are potential divisions of labour in information encoding in the neocortical microcircuit. Both PV+ and SST+ subtypes carried information about the 1-bit signal regardless of the encoding format we used, but our results imply that, roughly, PV+ interneurons rapidly provide more information about synchronous inputs, while SST+

interneurons gradually accumulate information about the rate of inputs. Given this, the synchronous activation of thalamocortical inputs<sup>26,27</sup> may activate perisomatic inhibition more strongly, while recurrent or top-down signals that build-up over time may activate distal dendritic inhibition more strongly. This would also suggest that reports that synchrony and rate can carry distinct information about sensory stimuli<sup>9,12</sup> may link certain aspects of sensory stimuli with certain forms of inhibition to pyramidal neurons. Future work should examine whether the information carried by PV+ and SST+ interneurons fits with information carried by the synchrony and rate of pyramidal cell activation, respectively.

It is important to note that our study was limited by a number of factors. First, we were performing our experiments *ex vivo*, and there are likely important differences in interneuron activity *in vivo* that relate to things like movement or neuromodulation<sup>22</sup>. Second, because we were using single-photon excitation with no optical inhibition, we could not guarantee that only a single neuron was being activated by illumination of the ROIs (**Fig. S1**), so it must be recognized that we were likely activating multiple presynaptic inputs and triggering recurrent, polysynaptic inputs. Third, our findings cannot directly inform us about whether these codes are actually used for computation *in vivo*. That requires behavioral responses from animals to determine whether downstream circuits utilize the information encoded with rate or synchrony<sup>28</sup>. Nonetheless, we believe that our findings are informative and can help to guide future work that attempts to examine potential divisions in coding in the neocortical circuit *in vivo*.

In summary, we found evidence that different subtypes of neurons in the neocortical microcircuit are differentially sensitive to information encoded with the synchrony or rate of inputs. This suggests that the brain does indeed use both rate and timing codes, and may do so using different mechanisms and for different purposes.

## Materials and Methods

### Animals

Gin-GFP (FVB-Tg(GadGFP)45704Swn/J; JAX#003718) and Gad-GFP animals (CB6-Tg(Gad1-EGFP)G42Zjh/J; JAX#007677) were obtained from Jackson Laboratory. Mice were weaned at 21 days, in a temperature controlled room with a 12 hour light/dark cycle. Mice were given food and water, *ad libitum*. All procedures were approved by the Canadian Council for Animal Care and the Local Animal Care Committee at the University of Toronto Scarborough.

### Viral Microinfusion

Mice 5-7 weeks old received bilateral microinfusion of AAV1-CamKii $\alpha$ -hChR2(H134R)-mCherry.WPRE.hGH (Addgene, #26975-AAV1) layer 2/3 of the barrel cortex (-1.3mmAP,  $\pm$  3.1 mm ML, -1.1 mm DV). Mice were treated with ketoprofen (5 mg/kg) and anesthetized with isofluorane (4% induction, 2% maintenance). The anesthetized animal was then placed on a stereotaxic frame (Stoelting) and holes drilled in the skull at the coordinates of interest. To inject the viral vectors, a Hamilton Neuros Syringe (Hamilton, #65460-05) was connected to a microinjector (QSI, Stoelting) to infuse the vectors at a volume of 0.15 $\mu$ L per side with a rate of 0.05  $\mu$ L/min. After each injection, the syringe was left in the brain for another 5 minutes to allow for sufficient diffusion of the virus. Following surgery, mice were treated with 0.5 ml of 0.9% saline subcutaneously and received ketoprofen post-operatively for 2-3 days.

### Immunohistochemistry

To confirm whether Gin-GFP and Gad67-GFP targeted SST+ and PV+ cells, respectively, brains from each transgenic line were fixed with 4% paraformaldehyde (PFA) via transcardial perfusion. After two days of fixation, the brains were sliced at 50  $\mu$ m thickness using a vibratome.

For PV staining, free-floating brain sections of the barrel cortex were first washed in PBS and then incubated in 1% H<sub>2</sub>O<sub>2</sub> in PBS for 30 minutes at room temperature. Slices were then blocked with PBS containing 10% goat serum, 3% bovine serum albumin, and 0.05% Triton-X-100 for 2 hours at room temperature. Afterwards, sections were incubated in PBS blocking buffer containing mouse anti-PV 1 $\alpha$  antibody (ThermoFisher, 1:500) overnight at 4°C. The next day, slices were washed in PBS and then incubated in PBS blocking buffer containing goat anti-rabbit 2 $\alpha$  antibody conjugated with an Alexafluor 594 (Life Technologies, 1:500) for 1 hour at room temperature.

For SST staining, free-floating brain sections of the barrel cortex were first washed in PBS and then incubated in 1% H<sub>2</sub>O<sub>2</sub> in PBS for 30 minutes at room temperature. Slices were then blocked with the same blocking solution as above for 2 hours at room temperature. Afterwards, sections were incubated in PBS blocking buffer containing mouse anti-SST 1 $\alpha$  antibody (Novus, 1:500) overnight at 4°C. The next day, slices were washed in PBS and then incubated in PBS blocking buffer containing goat anti-rabbit 2 $\alpha$  antibody conjugated with an Alexafluor 594 (Life Technologies, 1:500) for 1 hour at room temperature. Following this, tyramide signal amplification (TSA) was performed by incubating the sections in Rhodamine



TSA reagent (1:30,000, diluted in 0.1 M Borate Buffer with 0.01% H<sub>2</sub>O<sub>2</sub>) for 30 minutes at room temperature.

Following staining, slices were washed with PBS, mounted onto gelatin-coated slides, and covered with a coverslip using Fluoshield (Sigma-Aldrich). Images were obtained using a confocal laser scanning microscope (Zeiss) with a 10x objective.

For cell counting experiments, L2/3 of the barrel cortex was imaged and was counted for GFP+, PV+ and SST+ cells. Approximately 4-6 sections/mouse were counted and averaged, with 4-6 mice/group. Genotypic specificity (total numbers of PV+ or SST+ cells / total numbers of GFP+ cells x 100), and efficiency (total numbers of GFP+ cells / total numbers of PV+ or SST+ cells x 100) were calculated.

### **Ex vivo slice electrophysiology**

Mice aged 7-12 weeks were anesthetized with 1.25% tribromoethanol (Avertin) and underwent cardiac perfusion using a chilled cutting solution containing (in mM): 60 sucrose, 25 NaHCO<sub>3</sub>, 1.25 NaH<sub>2</sub>PO<sub>4</sub>, 2.5 KCL, 0.5 CaCl<sub>2</sub>, 4 MgCl<sub>2</sub>, 20 D-glucose, 3 Na pyruvate and 1 ascorbic acid, injected at a rate of approximately 1ml/min. After 6-8 minutes of perfusion, the brain was quickly removed and cut coronally (350  $\mu$ m thickness) with a vibratome (VT1000S) in chilled cutting solution to obtain slices of the barrel cortex. Once cut, these slices were then transferred into a recovery chamber comprising of a 50:50 mix of warm (34°C) cutting solution and aCSF containing (in mM): 125 NaCl, 25 NaHCO<sub>3</sub>, 1.25 NaH<sub>2</sub>PO<sub>4</sub>, 2.5 KCl, 1.3 CaCl<sub>2</sub>, 1MgCl<sub>2</sub>, 20 D-glucose, 3 Na pyruvate, and 1 ascorbic acid. Following 30min-1hr of incubation, the slices were then transferred into an incubation chamber with room temperature aCSF. Within the recording chamber, aCSF was heated to 32°C using an in-line heater. Whole-cell current-clamp recordings were made using glass pipettes filled with (in mM): 126 K D-Gluconate, 5 KCl, 10 HEPES, 4 MgATP, 0.3 NaGTP, 10 Na-phosphocreatine. Glass capillary pipettes were pulled with a Flaming/Brown pipette puller with tip resistances between 4-8 M $\Omega$ .

### **Patterned illumination with a digital multimirror device**

To optically a 1-bit random signal into the activity of L2/3 pyramidal neurons, we used one-photon patterned illumination with a digital multimirror device (Polygon400, Mightex). After viral infusion surgery, and 2-3 weeks for expression (see above) we prepared slices and excited ROIs containing mCherry+ neurons in the slice. To target optical activation to as few neurons as possible, while maintaining reliable spiking responses in activated cells, we used software to draw circular patterns of 15  $\mu$ m in diameter (PolyScan V2, Mightex) around mCherry+ cells. These patterns defined discs of illumination. The light used to activate the cells was generated from an LED with a 470 nm wavelength, and the optical power at the microscope stage was set to 19 mW/mm<sup>2</sup>, which we found to be sufficient for driving reliable spiking responses in targeted neurons.

To test the spatial specificity of our patterned illumination setup and determine whether it could reliably induce spiking, we conducted whole-cell patch clamp recordings from ChR2+ layer 2/3 pyramidal cells in the barrel cortex while illuminating circular patterns of blue light placed 25  $\mu$ m apart in sequential order (see **Fig. S1**) in both the dorsal-ventral axis as well as the medial-lateral axis of the slice (470 nm, 15  $\mu$ m, 19 mW/mm<sup>2</sup>). To determine the probability of spiking based upon the spatial distance of the light spot, the median probability of a spike

occurring was calculated as well as the 95% confidence interval for the median via bootstrapping ( $n = 1000$ ).

### Identifying ROIs with monosynaptic connections to a patched neuron

A criterion for including cell responses to rate and temporally coded signals was passing a test for reliable monosynaptic connections. Evidence for a mono-synaptic connection was defined as 'a positive deflection in membrane potential 0.5-2.0 ms after the onset of optogenetic stimulation'. This was characterized by fitting a piecewise linear function of the form:

$$\hat{V}_N(t) = \sum_{n=1}^N \max(0, (w_n(t - \theta_n))) + V_{base} \quad (1)$$

corresponding to the sum of  $N$  linear functions with slopes  $w$  with  $N$  different latencies  $\theta$  with a constant baseline  $V_{base}$ . Functions with order  $0 \leq N \leq 6$  were fit. Functions of order  $N = 0$  correspond to a constant baseline, i.e., no mono-synaptic connection. Likewise, functions of order  $N=1$  correspond to a drifting baseline, i.e., no mono-synaptic connection. These models were compared to form a null model of order  $N_{null}$  with a chi-squared goodness of fit test:

$$D_{null} = -T \log \left[ \frac{\sum_{i=0}^T (V(i) - \hat{V}_1(i))^2}{\sum_{j=0}^T (V(j) - \hat{V}_0(j))^2} \right] \quad (2)$$

$$p_{null} = \frac{1}{\Gamma(1/2)} \gamma(1/2, D_{null}/2) \quad (3)$$

$$N_{null} = \begin{cases} 1, & \text{if } p_{null} > 0.95 \\ 0, & \text{otherwise} \end{cases} \quad (4)$$

where  $\Gamma(x)$  corresponds to the gamma function, and  $\gamma(x,y)$  corresponds to the lower incomplete gamma function. Functions of order  $N \geq 2$  correspond to models with a mono-synaptic connection. The model with the lowest Bayesian information criterion is our alternative model with order  $N_{alt}$  i.e.,

$$N_{alt} = \underset{N \geq 2}{\operatorname{argmin}} \left[ T \log \left( \frac{1}{T} \sum_t V(t) - \hat{V}_N(t) \right) + N \log(T) \right] \quad (5)$$

Subsequently, the alternative model  $\hat{V}_{alt}(t)$  of order  $N_{alt}$  and the null model  $\hat{V}_{null}(t)$  of order  $N_{null}$  are compared with a chi-squared goodness of fit test:

$$D_{alt} = -T \log \left[ \frac{\sum_{i=0}^T (V(i) - \hat{V}_{alt}(i))^2}{\sum_{j=0}^T (V(j) - \hat{V}_{null}(j))^2} \right] \quad (6)$$

$$p_{alt} = \frac{1}{\Gamma((N_{alt} - N_{null})/2)} \gamma((N_{alt} - N_{null})/2, D_{alt}/2) \quad (7)$$

if  $p_{alt} \geq 0.99$ , this is taken as evidence for a mono-synaptic connection in a given trial. Each of the 10 optogenetically targeted inputs underwent 5 trials for a total of 50 trials. From this, if 45/50 (90%) trials demonstrated mono-synaptic input, the monosynaptic reliability test was passed. This allows for a degree of flexibility in the reliability of inputs, e.g., half of the optogenetically stimulated inputs could fail one trial, or one input could fail all trials.

### Encoding a 1-bit random signal with synchrony or rate of ROI activation

To examine the responses of different neuron types to synchrony and rate of inputs we developed protocols for optically encoding a random 1-bit signal (0 versus 1) in a brain slice. Our protocols relied on monosynaptic inputs from 10 ROIs, so during a recording session, we first sought to find 10 ROIs that contained monosynaptically connected neurons with the cell that was being recorded. To do this, we drew 10 discs of illumination centred on mCherry+ neurons, that were in close proximity to the mCherry- patched cell. In order to mitigate unintended cross-stimulation of ROIs, we tried to space out the spots from each other by at least 50  $\mu\text{m}$ , as we had previously observed that the probability of spiking dropped significantly if a spot was placed at least 50  $\mu\text{m}$  from a cell (**Fig. S1**). To determine ROIs with monosynaptic connections to the recorded neuron, we stimulated each ROI five times for 50 ms. If activation of the ROI elicited a depolarization in the recorded cell 0.5-5 ms after the onset of illumination at least 90% of the time, cell 100% of the time. Once the synaptic pairs were found, we excited the 10 presynaptic mCherry+ cells using the artificial synchrony and rate optogenetic protocols we developed

A one-bit signal  $s(t)$  was encoded in the optogenetically-driven activity of 10 presynaptic L2/3 pyramidal cells using either a rate or temporal code. Under a rate code, presynaptic neurons were driven by pulses  $x_{1:N}^R(t)$  sampled from N independent inhomogeneous Poisson process with, depending on the value of  $s(t)$ , a high or a low rate  $\lambda^R(t)$  i.e.,

$$\lambda^R(t) = \begin{cases} 5\text{Hz}, & \text{if } s(t) = 1 \\ 0.5\text{Hz}, & \text{if } s(t) = 0 \end{cases} \quad (8)$$

$$\mathbf{x}^R(t) \sim \text{Poisson}(\lambda^R(t)) \quad (9)$$

Under a synchrony code, presynaptic neurons were driven by pulses  $x_{1:N}^T(t)$  sampled from N independent homogeneous Poisson processes or from a single homogeneous Poisson process, creating states of uncorrelated and perfectly correlated pulses:

$$\mathbf{x}^T(t) \sim \begin{cases} \text{Poisson}(\lambda^T), & \text{if } s(t) = 1 \\ \text{Poisson}(\lambda_{1:N}^T), & \text{if } s(t) = 0 \end{cases} \quad (10)$$

The rate  $\lambda^I$  was set to the mean rate for the rate-coded signal, i.e.,  $\lambda^I = \langle \lambda^R(t) \rangle$

## Data Analysis

All data analysis code was written in python 2.7 using tools from the scientific computing ecosystem (numpy<sup>29</sup>, scipy<sup>30</sup>, matplotlib<sup>31</sup>, scikit-learn<sup>32</sup>, pandas<sup>33</sup>). All code will be made publicly available prior to publication.

## Electrophysiological characterization

Electrophysiological characteristics for each neuron were estimated from 500ms current injection steps ( $I_{inj}$ ) ranging from -80 pA to 400 pA in 40 pA increments. Eleven features were extracted in total including: Resting membrane potential ( $V_{rest}$ , mV), Input resistance ( $R_{in}$ , M $\Omega$ ), Cell capacitance ( $C_{mem}$  pF), membrane time-constant ( $\tau_{mem}$ , ms), Rheobase ( $I_{\theta}$ , nA), f-I slope ( $f'$ , Hz/nA), Spike adaptation ratio, Sag Amplitude ( $V_{sag}$ , mV), Spike threshold ( $V_{\theta}$ , mV), Spike amplitude ( $V_{amp}$ , mV), and Spike half-width ( $T_{half}$ , ms). Standard definitions for each of these features were used<sup>16,34,35</sup>, but we will include them here for clarity.

- Spike times were identified as times at which membrane potentials crossed -20 mV with a positive gradient.
- Rheobase  $I_{\theta}$  (current at which non-zero spike counts occur) and f-I slope  $f'$  were estimated by fitting the non-linear function  $f(I) = \max(0, f'(I + I_{\theta}))$  to spike counts at each  $I_{inj}$  step value. Many cell types display spike accommodation with non-linear above-rheobase f-I relationships. We define f-I slope to mean the initial slope above rheobase. Therefore, we fit this function to sub-rheobase and up to the first five above-rheobase spike counts inclusively.
- Spike adaptation ratio was estimated as the ratio between the last and first spike-time intervals (the difference between spike times). This requires a minimum of three spikes to estimate. For spike-trains with  $\geq 7$  spikes, the last two and first two intervals were used to estimate the ratio to improve estimate quality. Only the spike train from the highest  $I_{inj}$  was used to estimate this feature.
- $V_{rest}$  was estimated as the average membrane potential in the 10 ms prior to current injection.
- $V_{sag}$  was estimated as  $V_{sag} = |\min(V) - V_{rest}|$  at  $I_{inj} = -80$  nA during current injection.
- $V_{\theta}$  was estimated from all extracted spikes. A window around each identified spike time was used to extract action potential  $V(t)$  traces and the z-scored slope  $z(V'(t))$  of each action potential was calculated.  $V_{\theta}$  was estimated as the membrane potential at which  $z(V'(t)) \geq 0.5$
- $V_{amp}$  was estimated as  $V_{amp} = |\max(V) - V_{\theta}|$  for each action potential
- $T_{half}$  is defined as the duration an action potential  $V(t) \geq 0.5(V_{amp} - V_{\theta})$  and was averaged across all extracted action potentials.
- $R_{in}$  measurements were calculated and averaged across membrane potentials resulting from sub-rheobase, non-zero current injection.  $R_{in}$  was calculated using Ohm's law as

$(V_{\infty} - V_{rest})/I_{inj}$  where the steady-state membrane potential  $V_{\infty}$  was estimated as the mean membrane potential in the last 10 ms of current injection.

- $\tau_{mem}$  measurements were taken from membrane potential decay 100 ms after sub-rheobase non-zero current injection. Estimates were calculated by fitting a single order exponential function of the form  $v = (v_0 - u) \exp(-t/\tau_{mem}) + u$  and averaged.
- $C_{mem}$  was calculated as  $\tau_{mem}/R_{in}$

## Mutual Information

Mutual information  $I^{36}$  between the response  $r(t)$  of the postsynaptic neuron and the one-bit signal  $s(t)$  was used to assess the performance of the postsynaptic neuron in encoding the temporally-coded signal.

$$I(r; s) = H(r) + H(s) - H(r, s) \quad (11)$$

where  $H(r)$ ,  $H(s)$ ,  $H(r, s)$  are the entropy of the response, signal, and joint entropy of the signal and response respectively.

Since temporal correlations increase amongst inputs when rates increase, the mutual information  $I$  was conditioned on the number of presynaptic inputs  $y(t) = \sum_{i=1}^N x_i(t)$  to discern how well the postsynaptic neuron encodes the rate-coded signal.

$$I(r; s|y) = H(r, y) + H(s, y) - H(r, s, y) - H(y) \quad (12)$$

where  $H(r, y)$ ,  $H(s, y)$ , and  $H(r, s, y)$  are the joint entropy of the postsynaptic response and presynaptic count, the signal state and the presynaptic input count, and the response, signal state, and presynaptic input count respectively, whereas  $H(y)$  is the entropy of the presynaptic input count

The entropy of discrete variables<sup>36,37</sup>  $U$  (signal state, presynaptic input count, postsynaptic spike count) was estimated via

$$H(U) = - \sum_u p(U = u) \log p(U = u) \quad (13)$$

The entropy of continuous variables (average membrane potential) was estimated by constructing histograms to approximate the probability density function of the variable, i.e.,

$$H(u) = - \sum_{i=1}^{B-1} p(b_i \leq u < b_{i+1}) \log [p(b_i < u < b_{i+1})] (b_{i+1} - b_i) \quad (14)$$



Along bin edges  $b$ , where the number of bins ( $N_{bins} = B-1$ ) was chosen as the maximum of Sturges' formula<sup>38</sup> and the Freedman-Diaconis rule<sup>39</sup>:

$$N_{bins}(u) = \max(2 \frac{IQR(u)}{n^{1/3}}, \log_2 n + 1) \quad (15)$$

Where  $n$  is the size of data  $u$ .

## References

1. Adrian, E. D. & Zotterman, Y. The impulses produced by sensory nerve endings. *J. Physiol.* **61**, 465–483 (1926).
2. Hubel, D. H. & Wiesel, T. N. Receptive fields of single neurones in the cat's striate cortex. *J. Physiol.* **148**, 574–591 (1959).
3. O'Keefe, J. & Dostrovsky, J. The hippocampus as a spatial map. Preliminary evidence from unit activity in the freely-moving rat. *Brain Res.* **34**, 171–175 (1971).
4. Georgopoulos, A. P., Kalaska, J. F., Caminiti, R. & Massey, J. T. On the relations between the direction of two-dimensional arm movements and cell discharge in primate motor cortex. *J. Neurosci.* **2**, 1527–1537 (1982).
5. VanRullen, R., Guyonneau, R. & Thorpe, S. Spike times make sense. *Trends Neurosci.* **28**, 1–4 (2005).
6. Panzeri, S., Petersen, R. S., Schultz, S. R., Lebedev, M. & Diamond, M. E. The Role of Spike Timing in the Coding of Stimulus Location in Rat Somatosensory Cortex. *Neuron* **29**, 769–777 (2001).
7. Arabzadeh, E., Panzeri, S. & Diamond, M. E. Deciphering the Spike Train of a Sensory Neuron: Counts and Temporal Patterns in the Rat Whisker Pathway. *J. Neurosci.* **26**, 9216–9226 (2006).
8. Huxter, J., Burgess, N. & O'Keefe, J. Independent rate and temporal coding in hippocampal pyramidal cells. *Nature* **425**, 828 (2003).
9. Riehle, A., Grün, S., Diesmann, M. & Aertsen, A. Spike Synchronization and Rate Modulation Differentially Involved in Motor Cortical Function. *Science* **278**, 1950–1953 (1997).
10. Zuo, Y. *et al.* Complementary Contributions of Spike Timing and Spike Rate to Perceptual

- Decisions in Rat S1 and S2 Cortex. *Curr. Biol.* **25**, 357–363 (2015).
11. Brette, R. Computing with Neural Synchrony. *PLoS Comput Biol* **8**, e1002561 (2012).
  12. Harvey, M. A., Saal, H. P., Dammann, J. F., III & Bensmaia, S. J. Multiplexing Stimulus Information through Rate and Temporal Codes in Primate Somatosensory Cortex. *PLOS Biol.* **11**, e1001558 (2013).
  13. Panzeri, S., Brunel, N., Logothetis, N. K. & Kayser, C. Sensory neural codes using multiplexed temporal scales. *Trends Neurosci.* **33**, 111–120 (2010).
  14. Bruno, R. M. Synchrony in sensation. *Netw. Circuits Comput.* **21**, 701–708 (2011).
  15. Tremblay, R., Lee, S. & Rudy, B. GABAergic Interneurons in the Neocortex: From Cellular Properties to Circuits. *Neuron* **91**, 260–292 (2016).
  16. Toledo-Rodriguez, M. *et al.* Correlation Maps Allow Neuronal Electrical Properties to be Predicted from Single-cell Gene Expression Profiles in Rat Neocortex. *Cereb. Cortex* **14**, 1310–1327 (2004).
  17. Hu, H., Gan, J. & Jonas, P. Fast-spiking, parvalbumin+ GABAergic interneurons: From cellular design to microcircuit function. *Science* **345**, (2014).
  18. Urban-Ciecko, J. & Barth, A. L. Somatostatin-expressing neurons in cortical networks. *Nat. Rev. Neurosci.* **17**, 401–409 (2016).
  19. Phillips, E. A. K., Schreiner, C. E. & Hasenstaub, A. R. Cortical Interneurons Differentially Regulate the Effects of Acoustic Context. *Cell Rep.* **20**, 771–778 (2017).
  20. El-Boustani, S. & Sur, M. Response-dependent dynamics of cell-specific inhibition in cortical networks *in vivo*. *Nat. Commun.* **5**, 5689 (2014).
  21. Chattopadhyaya, B. *et al.* Experience and Activity-Dependent Maturation of Perisomatic GABAergic Innervation in Primary Visual Cortex during a Postnatal Critical Period. *J. Neurosci.* **24**, 9598–9611 (2004).

22. Gentet, L. J. *et al.* Unique functional properties of somatostatin-expressing GABAergic neurons in mouse barrel cortex. *Nat. Neurosci.* **15**, 607–612 (2012).
23. Yavorska, I. & Wehr, M. Somatostatin-Expressing Inhibitory Interneurons in Cortical Circuits. *Front. Neural Circuits* **10**, (2016).
24. Tamamaki, N. *et al.* Green fluorescent protein expression and colocalization with calretinin, parvalbumin, and somatostatin in the GAD67-GFP knock-in mouse. *J. Comp. Neurol.* **467**, 60–79 (2003).
25. Reyes-Puerta, V. *et al.* High Stimulus-Related Information in Barrel Cortex Inhibitory Interneurons. *PLOS Comput. Biol.* **11**, e1004121 (2015).
26. Wang, Q., Webber, R. M. & Stanley, G. B. Thalamic synchrony and the adaptive gating of information flow to cortex. *Nat. Neurosci.* **13**, 1534–1541 (2010).
27. Temereanca, S., Brown, E. N. & Simons, D. J. Rapid changes in thalamic firing synchrony during repetitive whisker stimulation. *J. Neurosci.* **28**, 11153–11164 (2008).
28. O'Connor, D. H. *et al.* Neural coding during active somatosensation revealed using illusory touch. *Nat Neurosci* **16**, 958–965 (2013).
29. van der Walt, S., Colbert, S. C. & Varoquaux, G. The NumPy Array: A Structure for Efficient Numerical Computation. *Comput. Sci. Eng.* **13**, 22–30 (2011).
30. Oliphant, T. E. Python for Scientific Computing. *Comput. Sci. Eng.* **9**, 10–20 (2007).
31. Hunter, J. D. Matplotlib: A 2D Graphics Environment. *Comput. Sci. Eng.* **9**, 90–95 (2007).
32. Pedregosa, F. *et al.* Scikit-learn: Machine Learning in Python. *J. Mach. Learn. Res.* **12**, 2825–2830 (2011).
33. McKinney, W. Data Structures for Statistical Computing in Python. in 51–56 (2010).
34. Tripathy, S. J., Savitskaya, J., Burton, S. D., Urban, N. N. & Gerkin, R. C. NeuroElectro: a window to the world's neuron electrophysiology data. *Front. Neuroinformatics* **8**, 40 (2014).

35. Tripathy, S. J., Burton, S. D., Geramita, M., Gerkin, R. C. & Urban, N. N. Brain-wide analysis of electrophysiological diversity yields novel categorization of mammalian neuron types. *J. Neurophysiol.* jn.00237.2015 (2015). doi:10.1152/jn.00237.2015
36. MacKay, D. J. C. *Information Theory, Inference, and Learning Algorithms*. (Cambridge University Press, 2003).
37. Shannon, C. E. A mathematical theory of communication. *Bell Syst. Tech. J.* **27**, 379–423 (1948).
38. Sturges, H. A. The Choice of a Class Interval. *J. Am. Stat. Assoc.* **21**, 65–66 (1926).
39. Freedman, D. & Diaconis, P. On the histogram as a density estimator:L2 theory. *Z. Für Wahrscheinlichkeitstheorie Verwandte Geb.* **57**, 453–476 (1981).



## Supplemental Figures

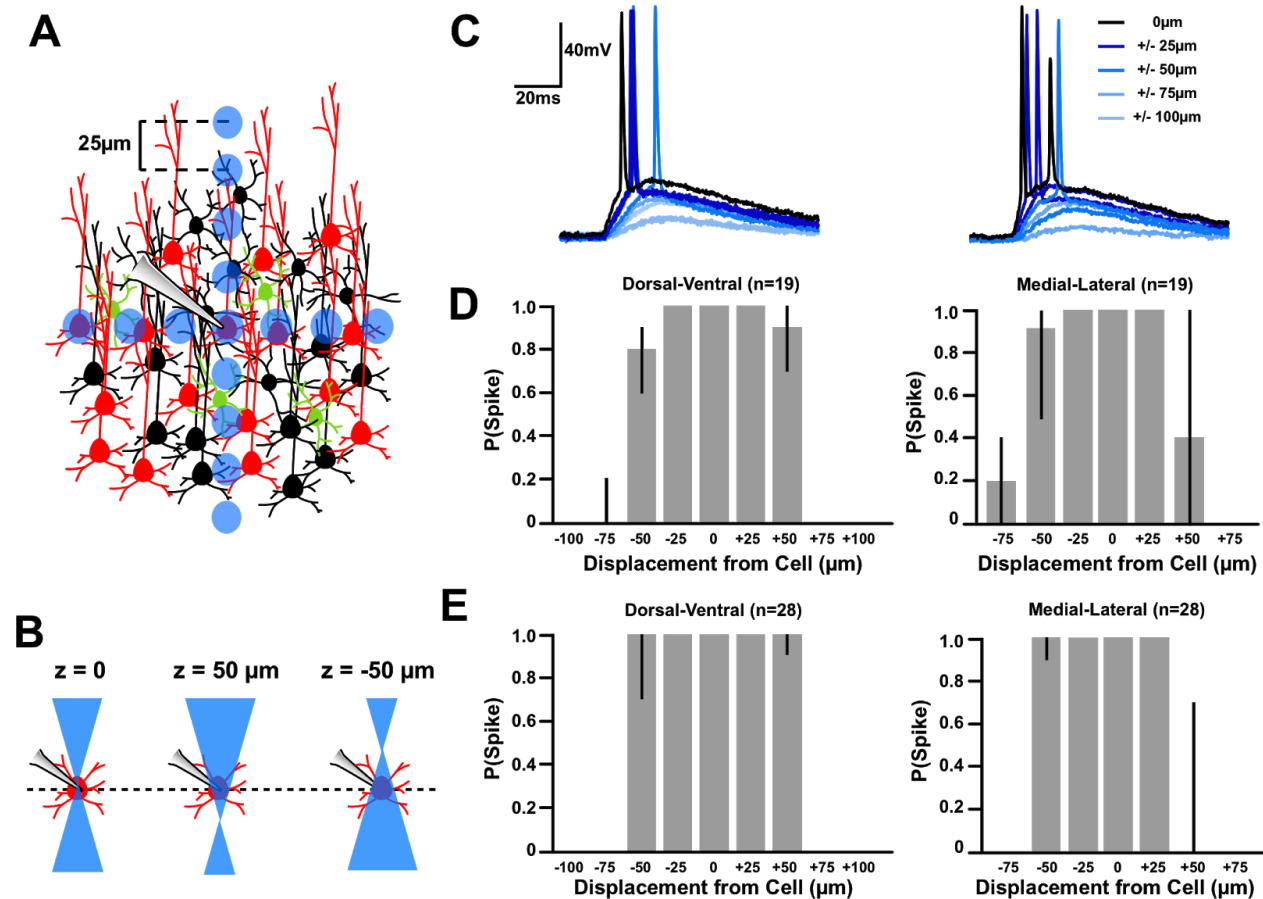

**Supplemental Figure 1. L2/3 Pyramidal Neurons reliably spike when illuminated with 15µm spots placed  $\leq 50 \mu\text{m}$  away.**

A) Experimental procedure. B) Given that single-photon illumination produces a cone of illumination above and below cells being stimulated, we conducted the protocol shown in A), while also stimulating the recorded cell when the light was in focus and directly on top of the cell ( $z = 0$ ), above it ( $z = 50 \mu\text{m}$ ) or below it ( $z = -50 \mu\text{m}$ ). C) Sample responses from ChR2+ neuron to spots placed at varying locations when the light was directly focused on the cell ( $z = 0$ ). D) Median spiking probability of ChR2+ neurons ( $n = 15$ ) to spots placed at varying locations within the microscope's field of view with spot directly in focus of the cell (i.e.  $z = 0$ ). E) Same analysis as D) except with cellular responses to spots illuminated when the focal point was above or below the cell of interest (i.e.  $z = 50 \mu\text{m}$  or  $z = -50 \mu\text{m}$ ).

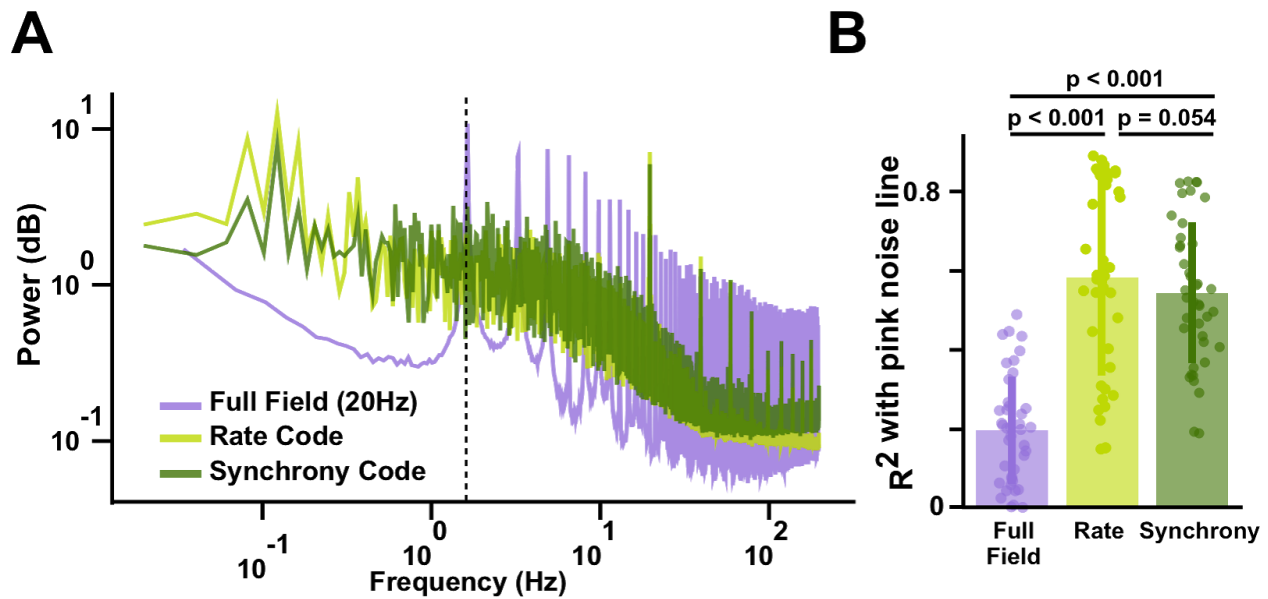

**Supplemental Figure 2. Artificial rate and synchrony of optical inputs to Layer 2/3 pyramidal neurons mimic *in vivo*-like responses in postsynaptic cells.**

A) Power spectral density (PSD) of neuronal recordings to either full field, rate or synchrony of optical inputs. F) Correlations of each spectrum to a pink noise line.

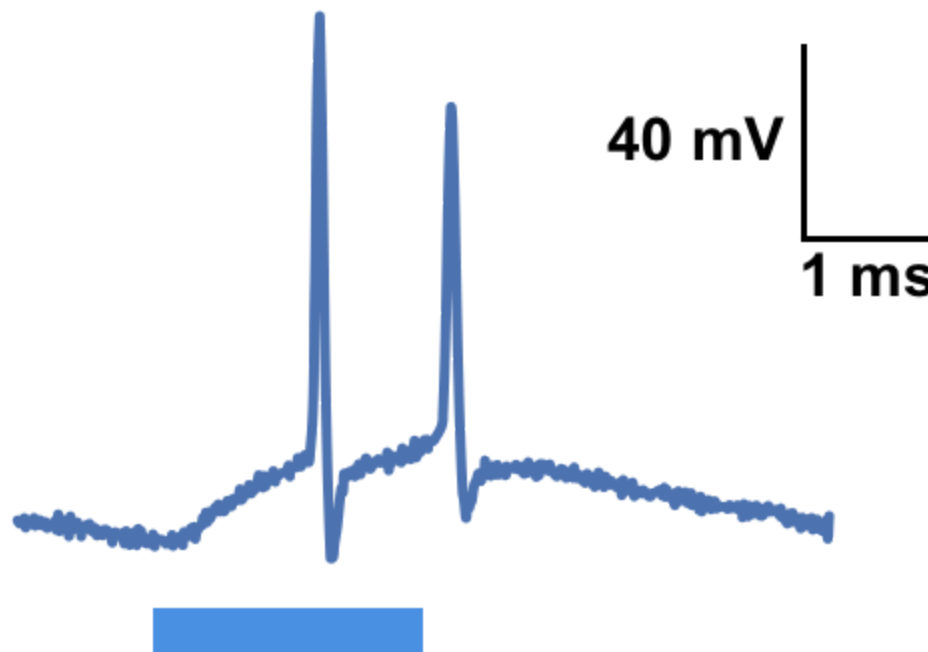

**Supplemental Figure 3. Prolonged polysynaptic activity was produced upon activation of our ROIs.**

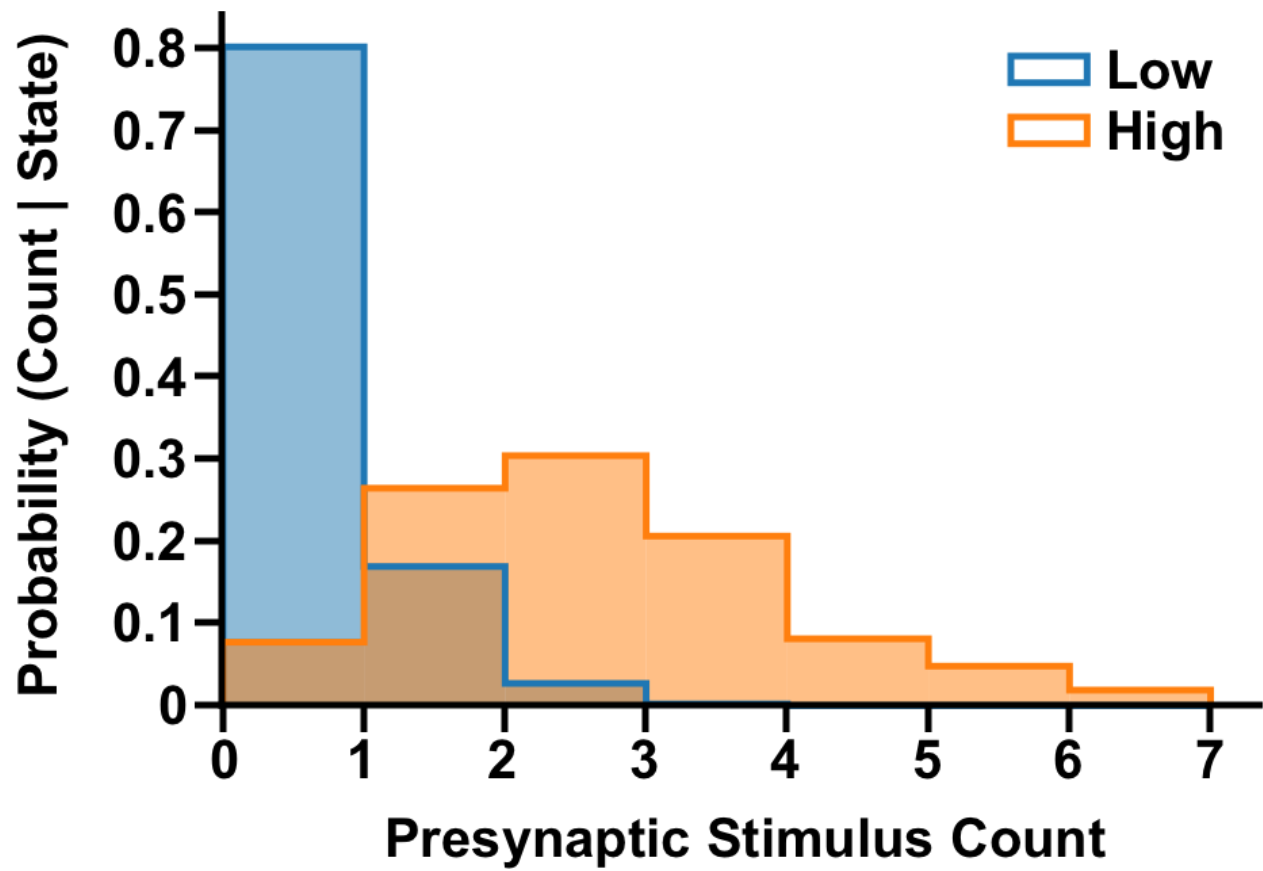

Supplemental Figure 4. Presynaptic spike count increases when higher rates of optical input were used.
